# Supplementary material for: Associations between dairy food consumption and chronic kidney disease in older adults
Source: PubMed Central journal article supplement (PMC5171808; doi:10.1038/srep39532), 2016-12-20
Supplement: srep39532-s1.pdf [file srep39532-s1.pdf]

## **Associations between dairy food consumption and chronic kidney disease in older adults**

*Running title:* Dairy food intake and chronic kidney disease

Bamini Gopinath<sup>1</sup>

David C Harris<sup>2</sup>

Victoria M Flood<sup>3</sup>

George Burlutsky<sup>1</sup>

Paul Mitchell<sup>1</sup>

<sup>1</sup>Centre for Vision Research, The Westmead Institute for Medical Research, University of Sydney, NSW, Australia.

<sup>2</sup>Centre for Transplantation and Renal Research, The Westmead Institute for Medical Research, University of Sydney, NSW, Australia.

<sup>3</sup>Faculty of Health Sciences, University of Sydney and St Vincent's Hospital, Australia.

**Online Supplementary Table 1.** Baseline characteristics of study participants who survived or died during the 10-year period (n=2682) <sup>a</sup>

| Characteristics                            | Survivors<br>(n=1952) | Died<br>(n=730) | <i>P</i> |
|--------------------------------------------|-----------------------|-----------------|----------|
| Age, yr (SD)                               | 62.7 (7.7)            | 72.3 (9.1)      | <0.0001  |
| Male, (%)                                  | 774 (39.6)            | 398 (54.5)      | <0.0001  |
| Receipt of pension                         | 926 (48.4)            | 552 (77.0)      | <0.0001  |
| Current smoker, (%)                        | 247 (12.8)            | 116 (16.3)      | 0.02     |
| Body mass index, kg/m <sup>2</sup><br>(SD) | 26.4 (4.4)            | 25.7 (4.5)      | 0.0002   |
| Serum triglycerides, mmol/L<br>(SD)        | 1.7 (1.0)             | 1.8 (1.2)       | 0.34     |
| Hypertension, <sup>b</sup> (%)             | 806 (41.3)            | 409 (56.0)      | <0.0001  |
| Diabetes, (%)                              | 122 (6.3)             | 77 (10.6)       | 0.0001   |
| Total dairy food intake                    | 1.7 (1.2)             | 1.6 (1.2)       | 0.01     |
| Reduced/low fat dairy intake               | 0.8 (1.0)             | 0.6 (1.0)       | <0.0001  |
| Regular fat dairy intake                   | 1.0 (0.9)             | 1.0 (0.9)       | 0.21     |
| Total dietary calcium intake               | 906.5 (417)           | 863.2 (418)     | 0.02     |

<sup>a</sup> Seven people had missing mortality data and so were not included in this Table.

<sup>b</sup> Defined as systolic BP greater than 140mm Hg or diastolic BP more than 90 mm Hg or using anti-hypertensive medications.
